# Supplementary material
Source: PubMed Central journal article supplement (PMC6056174)

**Supplementary Figure 1. Flow Chart of the Study Selection Process**

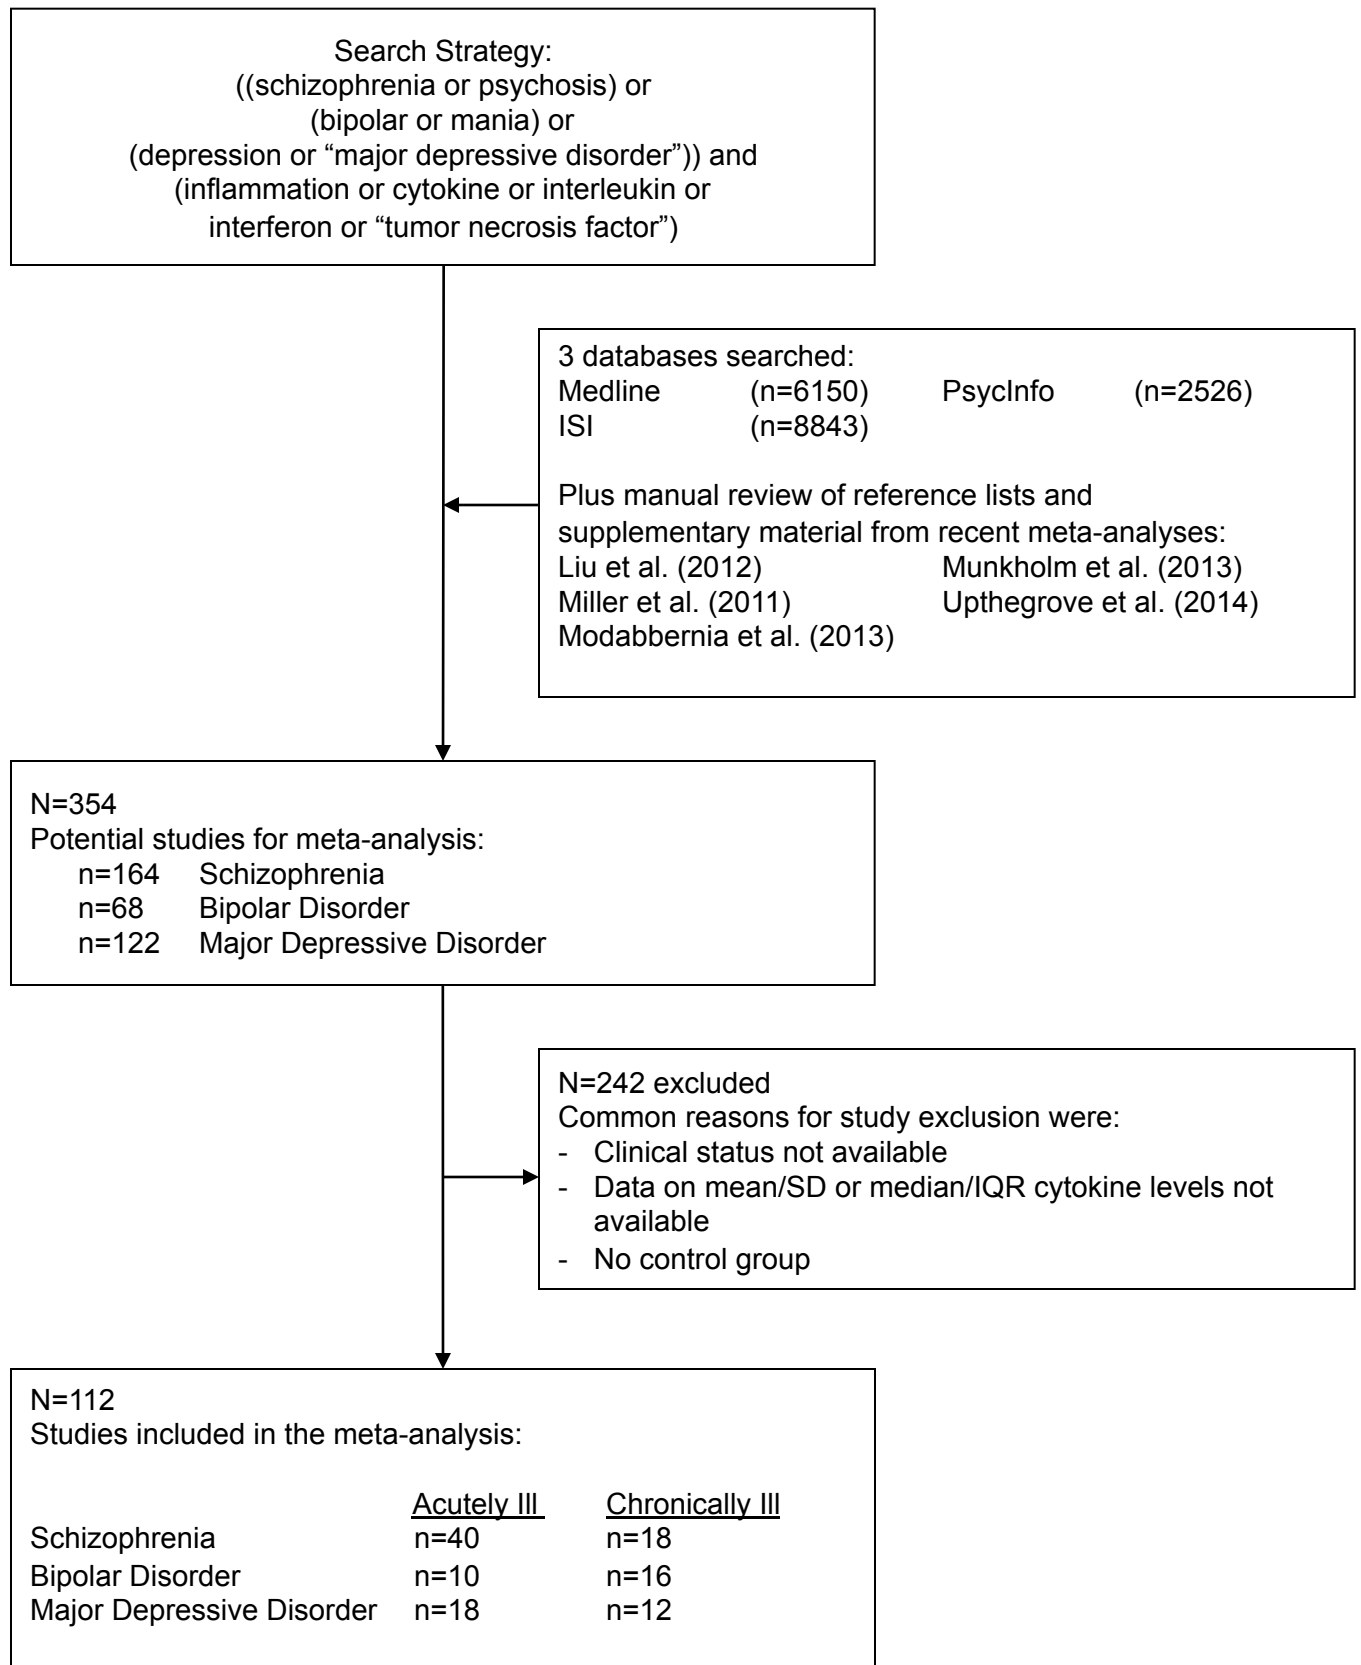

Supplement: NIHMS783442-supplement-Supplementary_Figure_1.pdf [file NIHMS783442-supplement-Supplementary_Figure_1.pdf]

Supplementary Figure 2. Funnel plot of TNF- $\alpha$  and First-Episode Psychosis

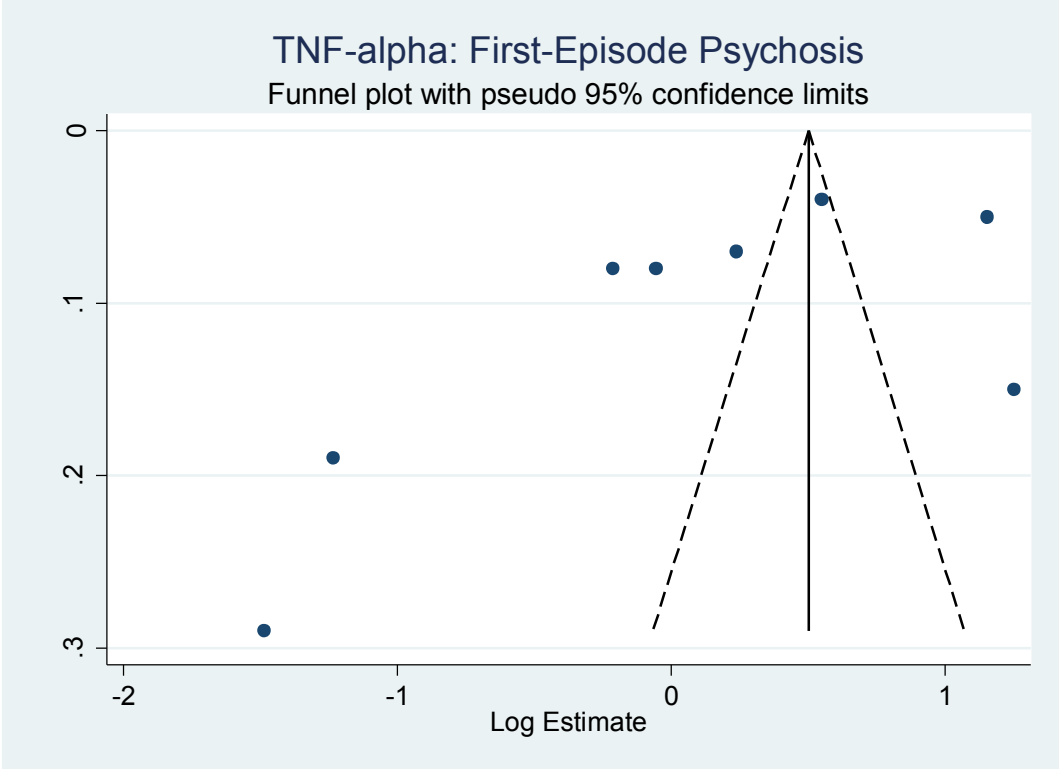

Supplement: NIHMS783442-supplement-Supplementary_Figure_2.pdf [file NIHMS783442-supplement-Supplementary_Figure_2.pdf]

**Supplementary Figure 3.** Funnel plot of IL-6 and Chronically Ill Patients with MDD

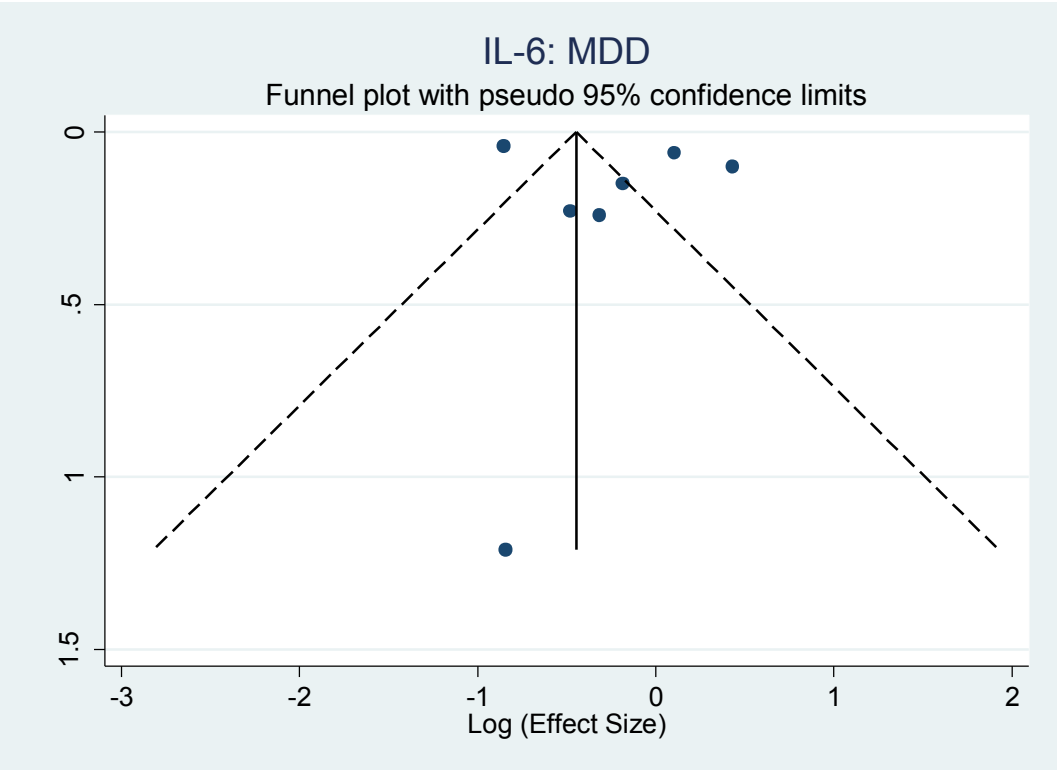

Supplement: NIHMS783442-supplement-Supplementary_Figure_3.pdf [file NIHMS783442-supplement-Supplementary_Figure_3.pdf]
